# Supplementary material
Source: Atypon-hosted journal article supplement (https://www.cornous.com/downloadsupplementory/197)
Supplement: 197 [file Supplementary file - Leaf.docx]

| RT | Name of the compound | Molecular formula | Molecular weight | Peak area % |
| --- | --- | --- | --- | --- |
| 3.865 | Formic acid | CH2O2 | 46 | 0.01 |
| 4.61 | Butanal, 4-chloro-2-methyl | C5H9ClO | 120 | 0.02 |
| 4.68 | 2-propanamine, 2-methyl | C4H11N | 73 | 0.02 |
| 4.968 | Methyllaurate | C8H10 | 106 | 0.43 |
| 5.107 | 3-phenylbutan-2-ol | C10H14O | 150 | 0.12 |
| 5.534 | N,n'-bis(carbobenzyloxy)cystine dibenzyl ester | C50H52NO8S | 826 | 0.04 |
| 7.13 | 1-hepten-4-ol | C7H14O | 114 | 0.13 |
| 8.217 | Borane, ethyldimethyl | C4H11B | 70 | 0.01 |
| 8.436 | 2h-pyran-3,4-dihydro-2-carboxamide | C6H9NO2 | 127 | 0.08 |
| 8.806 | Borane, trimethyl | C3H9B | 56 | 0.02 |
| 9.15 | Butanenitrile | C4H7N | 69 | 0.01 |
| 9.21 | 2-propyn-1-ol | C3H4O | 56 | 0.01 |
| 9.36 | Acetic acid, pentyl ester | C7H14O2 | 130 | 0.53 |
| 9.425 | 2-propanone, 1-(1,3-dioxolan-2-yl | C6H10O3 | 973 | 0.49 |
| 9.915 | 2,4,4-trimethyl-5,6-dihydro-4h-1,3-oxazin-6-one | C7H11NO2 | 141 | 0.04 |
| 10.1 | 2,3-epoxybutane | C4H8O | 72 | 0.28 |
| 11.375 | Pent-4-enoic acid | C5H8O2 | 100 | 0.03 |
| 11.43 | 6-{3',5'-dibromo-4'-(4"-chlorobutoxy)phenyl]methyl}naphthalene-2-ol | C21H19Br2ClO2 | 496 | 0.02 |
| 13.14 | Cyclobutane, methyl | C5H10 | 70 | 0.01 |
| 13.36 | Butane, 1,1'-oxybis[4-chloro- $$ ether, bis(4-chlorobutyl) | C8H16Cl2O | 198 | 0.13 |
| 13.669 | 2-naphthaleneacetic acid, decahydro-1,5-dihydroxy-.alpha.,4a-dimethyl-8-oxo-, methyl ester, [1.alpha.,2.beta] | C15H24O5 | 284 | 0.03 |
| 13.89 | 1,1-dimethoxy-2-ethyl hexane | C10H22O2 | 174 | 0.06 |
| 13.995 | Propanenitrile, 3-hydroxy | C3H5NO | 71 | 0.09 |
| 14.035 | 1,2-propadiene | C3H4 | 40 | 0.06 |
| 14.077 | [1,2,3,4]tetrazolo[1,5-b][1,2,4]triazine, 5,6,7,8-tetrahydro- | C3H6N6 | 126 | 0.16 |
| 14.151 | 3-butyn-1-ol | C4H6O | 70 | 0.07 |
| 14.317 | Trans-3-oxiranyl-2-(2-propynyl)cyclohexanol | C11H16O2 | 180 | 0.15 |
| 14.36 | (s)-6-hepten-1-yn-3-ol | C7H10O | 110 | 0.02 |
| 14.53 | Guanosine | C10H13N5O5 | 283 | 3.87 |
| 14.815 | 1,2-dibenzyloxybenzene, 4-oxiranylmethoxy | C23H22O4 | 362 | 0.04 |
| 15.085 | Heptane, 3,3,5-trimethyl | C10H22 | 142 | 0.04 |
| 15.172 | Butyric acid | C4H8O2 | 88 | 0.17 |
| 15.391 | Diisobutyl 2-oxomalonate | C11H18O5 | 230 | 0.14 |
| 16.504 | 1,2-benzenedicarboxylic acid, diethyl ester | C12H14O4 | 222 | 0.5 |
| 16.585 | [1r-(1.alpha.,4.beta.,5.beta.)]-[5-(5-chloro-4,7,7-trimethyl-6-oxabicyclo[3.2.1]oct-4-yl)-1-pentynyl]trimethylsilane | C18H31ClOSi | 326 | 0.02 |
| 16.81 | Butanoic acid | C4H8O2 | 88 | 0.38 |
| 16.95 | 2-propenoic acid, ethenyl ester | C5H6O2 | 98 | 0.07 |
| 16.986 | 2-propenoic acid, ethyl ester | C5H8O2 | 100 | 0.05 |
| 17.025 | Cyclohexane, [3-(2,2,2-trifluoroethoxy)propyl]- | C11H19F3O | 224 | 0.14 |
| 17.135 | 3-pentanol, 2,4-dimethyl- | C7H16O | 116 | 0.14 |
| 17.24 | 1-bromo-2-fluorobutane | C4H8BrF | 154 | 0.24 |
| 17.76 | Ether, butyl isopentyl | C9H20O | 144 | 10.44 |
| 18.255 | D-fructose, 3-o-methyl- | C7H14O6 | 194 | 31.43 |
| 18.487 | Mome inositol | C7H14O6 | 194 | 32.12 |
| 18.752 | Docosane | C22H46 | 310 | 0.13 |
| 18.95 | 4-o-methylmannose | C7H14O6 | 194 | 2.22 |
| 19.14 | Non-2-en-1-ol | C9H18O | 142 | 0.1 |
| 19.214 | 3,7,11,15-tetramethyl-2-hexadecen-1-ol | C20H40O | 296 | 1.23 |
| 19.289 | Pentane, 1-bromo- | C5H11Br | 150 | 0.23 |
| 19.37 | Benzene, pentachloro(trichloroethenyl)- | C8Cl8 | 376 | 0.03 |
| 19.483 | 1-decyne | C10H18 | 138 | 0.15 |
| 19.687 | 6-octen-1-ol, 3,7-dimethyl-, propanoate | C13H24O2 | 212 | 0.29 |
| 20.67 | 1,2-benzenedicarboxylic acid, dibutyl ester | C16H22O4 | 278 | 0.04 |
| 21.765 | Oxiranemethanol, 3-propyl-, (2s-trans)- | C6H12O2 | 116 | 0.06 |
| 21.944 | 2-propenoic acid, 1-methylethyl ester | C6H10O2 | 114 | 0.07 |
| 22.083 | Phytol | C20H40O | 296 | 1.11 |
| 22.9 | Porphyrinogen-2,3,7,8,12,13,17,18-octakis(propiononitrile) | C44H44N12 | 740 | 0.01 |
| 23.638 | 3-methoxysulpholane | C5H10O3S | 150 | 0.05 |
| 24.037 | Cyclopropane,[[(1,1dimethylethyl)sulfinyl]methyl]- | C8H16OS | 160 | 0.02 |
| 24.376 | 1,2,3-tri(t-butyl)cyclopropenylium tribromide | C15H27Br3 | 444 | 0.02 |
| 24.674 | 2-[p-(trimethylsilyloxy)tetraethoxyphenyl]-2-[(trimethylsilyloxy)triethoxy]propane- | C35H60OSi2 | 680 | 0.04 |
| 25.355 | 4-tert-butyl-3-chloro-1-methyl-.delta.(2)-1,2,4-triazolin-5-one | C7H12ClN3O | 189 | 0.05 |
| 25.448 | (z)-3-(pentadec-8-en-1-yl)phenol | C21H34O | 302 | 1.47 |
| 25.585 | Acetic acid, 4-methylphenyl ester | C9H10O2 | 150 | 0.19 |
| 25.705 | Methylcyclohexylacetate | C9H16O2 | 156 | 0.11 |
| 25.806 | 1,2,4-triazole, 3-heptafluoropropyl-5-amino- | C5H3F7N4 | 252 | 0.09 |
| 25.877 | 1,1,1,3,5,5,7,7,7-nonamethyl-3-(trimethylsiloxy)tetrasiloxane | C12H36O4Si5 | 384 | 0.17 |
| 25.972 | (7s,8r)-4-endo-[(tert-butyldimethylsilyl)-xy]-2-carbethoxy-7,8-(isopropylidenedioxy)bicyclo[3.3.0]oct-2-en-6- | C20H32O6Si | 396 | 0.03 |
| 26.07 | 1-pentamethyldisilyloxyoctadecane | C23H52OSi2 | 400 | 0.03 |
| 26.27 | Furo[3,4-b]furan-2,6(3h,4h)-dione, 4.beta.-ethyl-3a.alpha.,6a.alpha.,-dihydro-3-methylene-, (-)- | C9H10O4 | 182 | 0.02 |
| 26.32 | R-2-[dimethyl(thiophosphinoyl)]-c-4,c-6-dimethyl-1,3-dithiane | C8H17PS3 | 240 | 0.01 |
| 26.495 | Cyclohexane, 1-(1,1-dimethylethyl)-4-methylene- | C11H20 | 152 | 0.05 |
| 26.61 | 1-o-(difluorophosphanyl)-2-o-(trimethylsilyl)[ tetrakis(t-butyl)]calix[4]pyrocatechol | C47H63F2O4PSi | 788 | 0.04 |
| 26.711 | Methyl neopentyl ketoxime | C7H15NO | 129 | 0.01 |
