# Supplementary material
Source: Atypon-hosted journal article supplement (https://www.cornous.com/downloadsupplementory/197)
Supplement: 197 [file supplementary file - Root.docx]

| RT | Name of the compound | Molecular formula | Molecular weight | Peak area % |
| --- | --- | --- | --- | --- |
| 3.835 | Acetaldehyde | C2H4O | 44 | 0.13 |
| 4.04 | 2-propenoic acid, 2-methoxyethyl ester | C6H10O3 | 130 | 0.02 |
| 4.505 | Benzene, 1-methyl-4-[[3-methyl-2-[[4-methyl-3-(1-methylethyl)-2-pentenyl]oxy]-2-butenyl]sulfonyl] | C21H32O3S | 364 | 0.08 |
| 4.665 | Glyceraldehyde | C3H6O3 | 90 | 0.36 |
| 4.84 | 1,1-dideuterio-2-methyl-1-propene | C4H6D2 | 58 | 0.02 |
| 5.535 | 2-[(benzylamino)methyl]-4-methyl-1-penten-3-ol | C14H21NO | 219 | 0.05 |
| 5.63 | Ethane, nitro- | C2H5NO2 | 75 | 0.01 |
| 5.84 | 1-propene | C3H6 | 42 | 0.07 |
| 6.23 | 2-propenoic acid, ethenyl ester | C2H6O2 | 98 | 0.05 |
| 7.105 | (E) ethyl undec-2-enoate | C13H24O2 | 212 | 0.12 |
| 7.545 | Propylamine, n,n,2,2-tetramethyl-, n-oxide | C7H17NO | 131 | 0.02 |
| 7.675 | 3-pentanol $$ pentan-3-ol | C5H12O | 88 | 0.08 |
| 7.72 | N-butyl nitrite | C4H9NO2 | 103 | 0.03 |
| 8.32 | Oxalic acid, diallyl ester | C8H10O4 | 170 | 0.01 |
| 8.37 | 1-butanol, 2-nitro- | C4H9NO3 | 119 | 0.08 |
| 8.525 | 4,4-dimethylpentyl acetate | C9H20O2 | 160 | 0.03 |
| 9.15 | Oxalic acid, butyl propyl ester | C9H16O4 | 188 | 0.33 |
| 9.24 | Butane, 1-isocyano- | C5H9N | 83 | 0.36 |
| 9.365 | 1,3-cyclohexane-1,3-d2-diamine, cis- | C6H12D2N2 | 116 | 0.85 |
| 9.595 | 5-amino-6-nitroso-2,4(1h,3h)-pyrimidinedione | C4H4N4O3 | 156 | 0.03 |
| 9.935 | Alpha.-amino-.gamma.-butyrolactone | C4H7NO2 | 101 | 0.15 |
| 10.1 | 1,3-dioxolane, 2,4,5-trimethyl- | C6H12O2 | 116 | 0.59 |
| 10.255 | Propanoic acid, 2-methyl- | C4H8O2 | 88 | 0.74 |
| 10.315 | 1,3-dioxolane-2-methanol | C4H8O3 | 104 | 0.64 |
| 10.455 | Propane | C3H8 | 44 | 0.45 |
| 10.605 | Dimethylamine | C2H7N | 45 | 0.03 |
| 11.36 | 4-[2-(benzyloxy)ethoxy]benzonitrile | C16H15NO2 | 253 | 0.03 |
| 11.41 | N-methyl-n-(methyl-d3)aminoheptane | C9H18D3N | 146 | 0.01 |
| 11.58 | 2-propyn-1-ol | C3H4O | 56 | 0.02 |
| 11.695 | 1,2,3-propanetriol, diacetate | C7H12O5 | 176 | 1.14 |
| 11.92 | 1,2,3-propanetriol | C3H8O3 | 92 | 0.14 |
| 12 | Oxalic acid, cyclobutyl ethyl ester | C8H12O4 | 172 | 0.06 |
| 12.45 | Acetaldehyde, (acetyloxy)-, 1-oxime, (e)- | C4H7NO3 | 117 | 0.19 |
| 12.54 | Dichlorofuranone | C4H4Cl2O2 | 154 | 0.11 |
| 12.75 | 2-methoxy-4-vinylphenol | C9H10O2 | 150 | 0.59 |
| 13.89 | Isobutyl alcohol-2-d1 | C4H9DO | 75 | 0.04 |
| 14.23 | Cyclopropane | C3H6 | 42 | 0.04 |
| 14.89 | Guanosine | C10H13N5O5 | 283 | 18.18 |
| 15.08 | Furan, 2-butyltetrahydro- | C8H16O | 128 | 0.12 |
| 15.125 | Eryhtro-3,4-epoxy-2-octanol | C8H16O2 | 144 | 0.02 |
| 15.575 | 2-oxetanone | C3H4O2 | 72 | 0.01 |
| 16.055 | Oxalic acid, butyl cyclobutyl ester | C10H16O4 | 200 | 0.05 |
| 16.15 | Oxalic acid, allyl butyl ester | C9H14O4 | 186 | 0.02 |
| 16.395 | Propanoic acid, 2-propenyl ester | C6H10O2 | 114 | 0.02 |
| 16.5 | 1,2-benzoldicarbonsaeure, di-(hex-1-en-5-yl-ester) | C20H26O4 | 330 | 0.46 |
| 16.74 | Ethanol, 2-(ethylamino)- | C4H11NO | 89 | 0.31 |
| 16.795 | 1-butanamine, n-ethyl- | C6H15N | 101 | 0.11 |
| 16.865 | 1-butanol, 3-methyl- | C5H12O | 88 | 0.53 |
| 16.96 | Butanoic acid, anhydride | C8H14O3 | 158 | 0.03 |
| 17.16 | Glycerin | C3H8O3 | 92 | 0.02 |
| 18.49 | Mome inositol | C7H14O6 | 194 | 66.75 |
| 18.75 | Pentadecane | C15H32 | 212 | 0.19 |
| 19.14 | 1-piperidineacetic acid, 2-ethenyl-6-oxo-, ethyl ester | C11H17NO3 | 211 | 0.02 |
| 19.215 | 1,9-nonanediol | C9H20O2 | 160 | 0.34 |
| 19.28 | 1-butanol, 3-methyl | C5H12O | 88 | 0.09 |
| 19.685 | Oxiranemethanol, 3-propyl-, (2s-trans)- | C6H12O2 | 116 | 0.12 |
| 19.93 | 2-methyloctanal | C9H18O | 142 | 0.07 |
| 20.14 | Non-2-en-1-ol | C9H18O | 142 | 0.05 |
| 20.665 | 1,2-benzenedicarboxylic acid, dibutyl ester | C16H22O4 | 278 | 0.04 |
| 21.765 | 2h-pyran-3,4-dihydro-2-carboxamide | C6H9NO2 | 127 | 0.03 |
| 21.9 | Diallyl ether of triethylene glycol | C12H22O4 | 230 | 0.13 |
| 22.085 | 2-hexadecen-1-ol, 3,7,11,15-tetramethyl-, [r-[r*,r*-(e)]] | C20H40O | 296 | 0.24 |
| 23.435 | Propanedioic acid, dibromo-, bis(trimethylsilyl) ester | C9H18Br2O4Si2 | 404 | 0.08 |
| 23.52 | (Z)-(+-)-cis-2-(2-octenyl)-3-undecyloxirane | C21H40O | 308 | 0.09 |
| 23.775 | 1-hepten-5-one $$ 6-hepten-3-one | C7H12O | 112 | 0.01 |
| 24.04 | Heptanal, 4-methyl-4-nitro-5-oxo- | C8H13NO4 | 187 | 0.02 |
| 24.58 | 1,1-diisobutoxy-butane | C12H26O2 | 202 | 0.01 |
| 24.67 | Propane, 2-methoxy-2-methyl- | C5H12O | 88 | 0.11 |
| 24.915 | Propanoic acid, ethenyl ester | C5H8O2 | 100 | 0.04 |
| 25.35 | 3,5-heptanedione, 2,2,6,6-tetramethyl-4-tricyclo[3.3.1.13,7]dec-1-yl- | C21H34O2 | 318 | 0.03 |
| 25.45 | Phenol, 3-pentadecyl- | C21H36O | 304 | 0.26 |
| 25.69 | (E,z)-3-chloro-1,1-dimethoxy-2-methyl-2-butene | C7H13ClO2 | 164 | 0.04 |
| 25.81 | Cyclohexanepropanol- | C9H18O | 142 | 0.24 |
| 25.88 | Silicate anion tetramer | C24H72O12Si12 | 888 | 0.31 |
| 25.94 | N-benzyl-2-[(methoxycarbonyl)acetylidene]-2,3-dihydro-1,3-benzothiazole | C19H17NO3S | 339 | 0.04 |
| 26.09 | Propanethioic acid, o-(trimethylsilyl) ester | C6H14OSSi | 162 | 0.37 |
| 26.235 | Oxirane,[[(3-chloro-2-propenyl)oxy]methyl]-, (e)- | C6H9ClO2 | 148 | 0.09 |
| 26.375 | 4-cyclopentene-1,3-dione | C5H4O2 | 96 | 0.11 |
| 26.525 | N,n-dibutyl-2,3-diphenylsuccinamide | C24H32N2O2 | 380 | 0.05 |
| 26.85 | 1-[(t-butyl)dimethylsilylthio)-2-methylpropane | C1024SSi | 204 | 0.01 |
| 26.945 | 2-[(benzyloxy)methyl]-4(5)-methylimidazole | C12H14N2O | 202 | 0.03 |
